# Supplementary material for: Wet chemical synthesis of apatite-based waste forms – A novel room temperature method for the immobilization of radioactive iodine
Source: Royal Society of Chemistry journal article supplement (doi:10.1039/c7ta00230k), 2017-01-01
Supplement: c7ta00230k1.pdf [file c7ta00230k1.pdf]

## Electronic Supplementary Information

Wet chemical synthesis of apatite-based waste forms – A novel room temperature method for immobilization of radioactive iodine

By Charles Cao, Saehwa Chong, Lynn Thirion, John C. Mauro, John S. McCloy, Ashutosh Goel

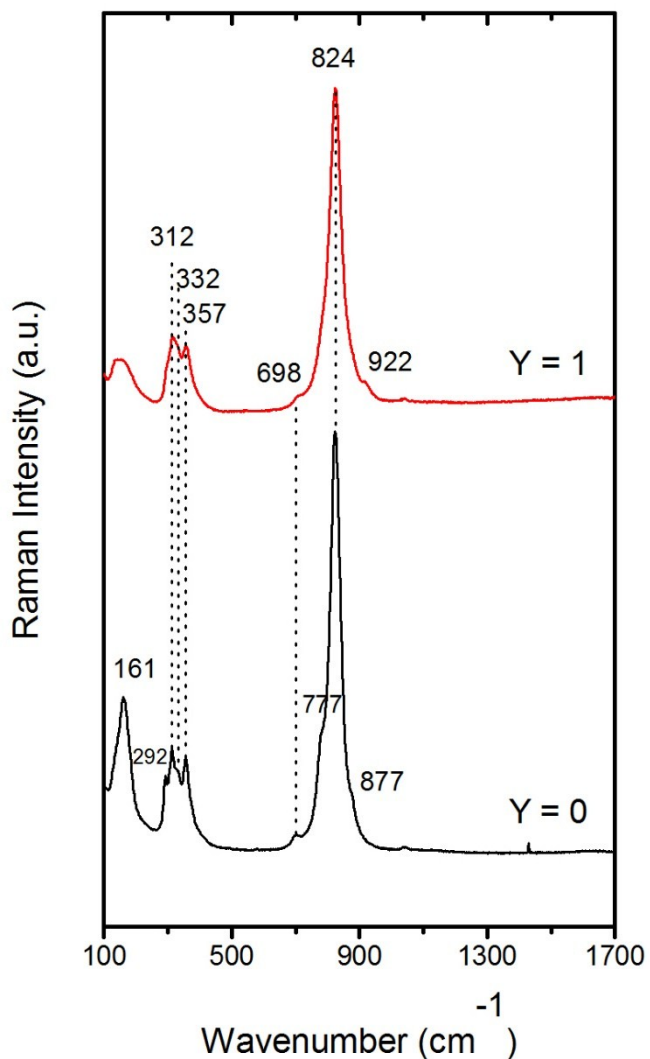

Fig. S1: Raman spectra of  $\text{Pb}_{10}(\text{VO}_4)_{(6-y)}(\text{PO}_4)_y\text{I}_2$  apatite series ( $y = 0, 1$ ). As noted in the article, due to the similarities and overlap between the phosphate and vanadate wavenumbers, no conclusions could be drawn from the Raman spectra besides the general broadening of peaks with the incorporation of smaller phosphate species. A comparison of bands can be found in [40] G. Bartholomäi and W. E. Klee, *Spectrochim. Acta A*, 1978, **34**, 831-843.
